# Supplementary material for: 29Si NMR and SAXS investigation of the hybrid organic–inorganic glasses obtained by consolidation of the melting gels
Source: Royal Society of Chemistry journal article supplement (doi:10.1039/c6dt04394a), 2017-01-01
Supplement: c6dt04394a1.pdf [file c6dt04394a1.pdf]

## Supplementary Information

The supplementary information contain:

- The deconvolution of spectra in individual components
- Equations used for the quantifications

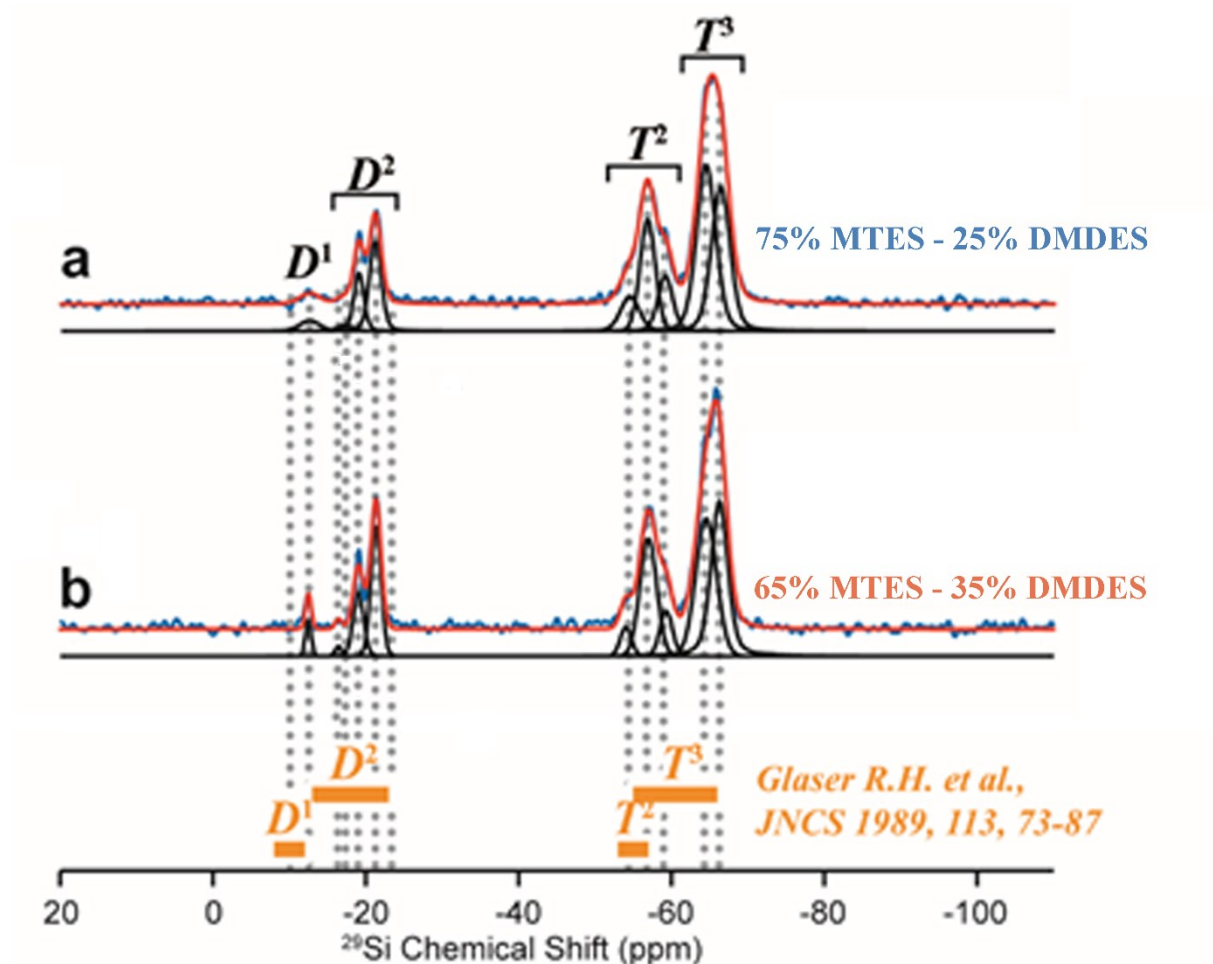

**Figure S1.** Quantitative  $^{29}\text{Si}$  echo-MAS NMR spectra (in blue) collected for the studied hybrid glasses. In red are models obtained for each sample from a simultaneous fit of multiple spectra (including  $^{29}\text{Si}$  echo-MAS with different recycling delays and  $^{29}\text{Si}[^1\text{H}]$  CP-MAS spectra with different contact times, not shown) with a single set of parameters (number of peaks, positions, width and Gaussian/Lorentzian ratio). The individual components used for the fits are shown in black below.

### Equations used for the quantifications.

Fixing an arbitrary number of C atoms  $n_{C,tot}$  (e.g.  $n_{C,tot} = 100$ ), one can then derive the number of carbons attributed to  $Me_2Si$  and  $MeSi$  groups that can be expected based on the ratios of MTES and DMDES precursors used for the synthesis ( $n_{MTES}/n_{DMDES}$ ). These numbers need to take into account the relative integrated intensities of carbon signals in  $\underline{C}H_2-O$  and  $\underline{C}H_3-CH_2-O$  environments:

$$I_{C,CH_2-O} \text{ and } I_{C,CH_3-CH_2-O}$$

$$n_{C,Me_2Si} = I_{C,Me_2Si} n_{C,tot} = n_{C,tot} \frac{1 - I_{C,CH_2-O} - I_{C,CH_3-CH_2-O}}{1 + 0.5(n_{MTES}/n_{DMDES})}$$

where the 0.5 comes from there being 2 C atoms per DMDES molecule. Similarly:

$$n_{C,MeSi} = I_{C,MeSi} n_{C,tot} = n_{C,tot} \frac{1 - I_{C,CH_2-O} - I_{C,CH_3-CH_2-O}}{1 + 2(n_{DMDES}/n_{MTES})}$$

These numbers impose in turn the number of Si atoms  $n_{Si,tot}$ , which relates to the relative integrated intensities of Si  $T^n$  and  $D^n$  species:

$$n_{Si,tot} = n_{Si,tot} \sum_{i=0...3} I_{Si,T^i} + n_{Si,tot} \sum_{i=0...2} I_{Si,D^i} = n_{C,MeSi} + 0.5n_{C,Me_2Si}$$

From there we can compare the number of unreacted Si-O-Et groups, given by:

$$n_{O-CH_2-CH_3} = n_{C,tot} I_{C,CH_3-CH_2-O} = n_{C,tot} I_{C,CH_2-O}$$

with the number of incompletely-condensed Si sites, *i.e.*  $D^n$  with  $n < 2$  and  $T^n$  with  $n < 3$ . (This comparison is simple here because we observe only  $D^1$  and  $T^2$  sites, meaning that there is no more than one uncondensed O atom per Si):

$$\sum_{i=0...1} n_{Si,D^i} + \sum_{i=0...2} n_{Si,T^i} = (n_{C,MeSi} + 0.5n_{C,Me_2Si}) \left( \sum_{i=0...3} I_{Si,T^i} + n_{Si,tot} \sum_{i=0...2} I_{Si,D^i} \right)$$

The difference between these numbers should correspond to the number of silanol groups.
